# Supplementary material
Source: publisher figshare collection journal article supplement (https://karger.figshare.com/articles/dataset/_/8875790)

# A) Age

# Supplementary Figure 4

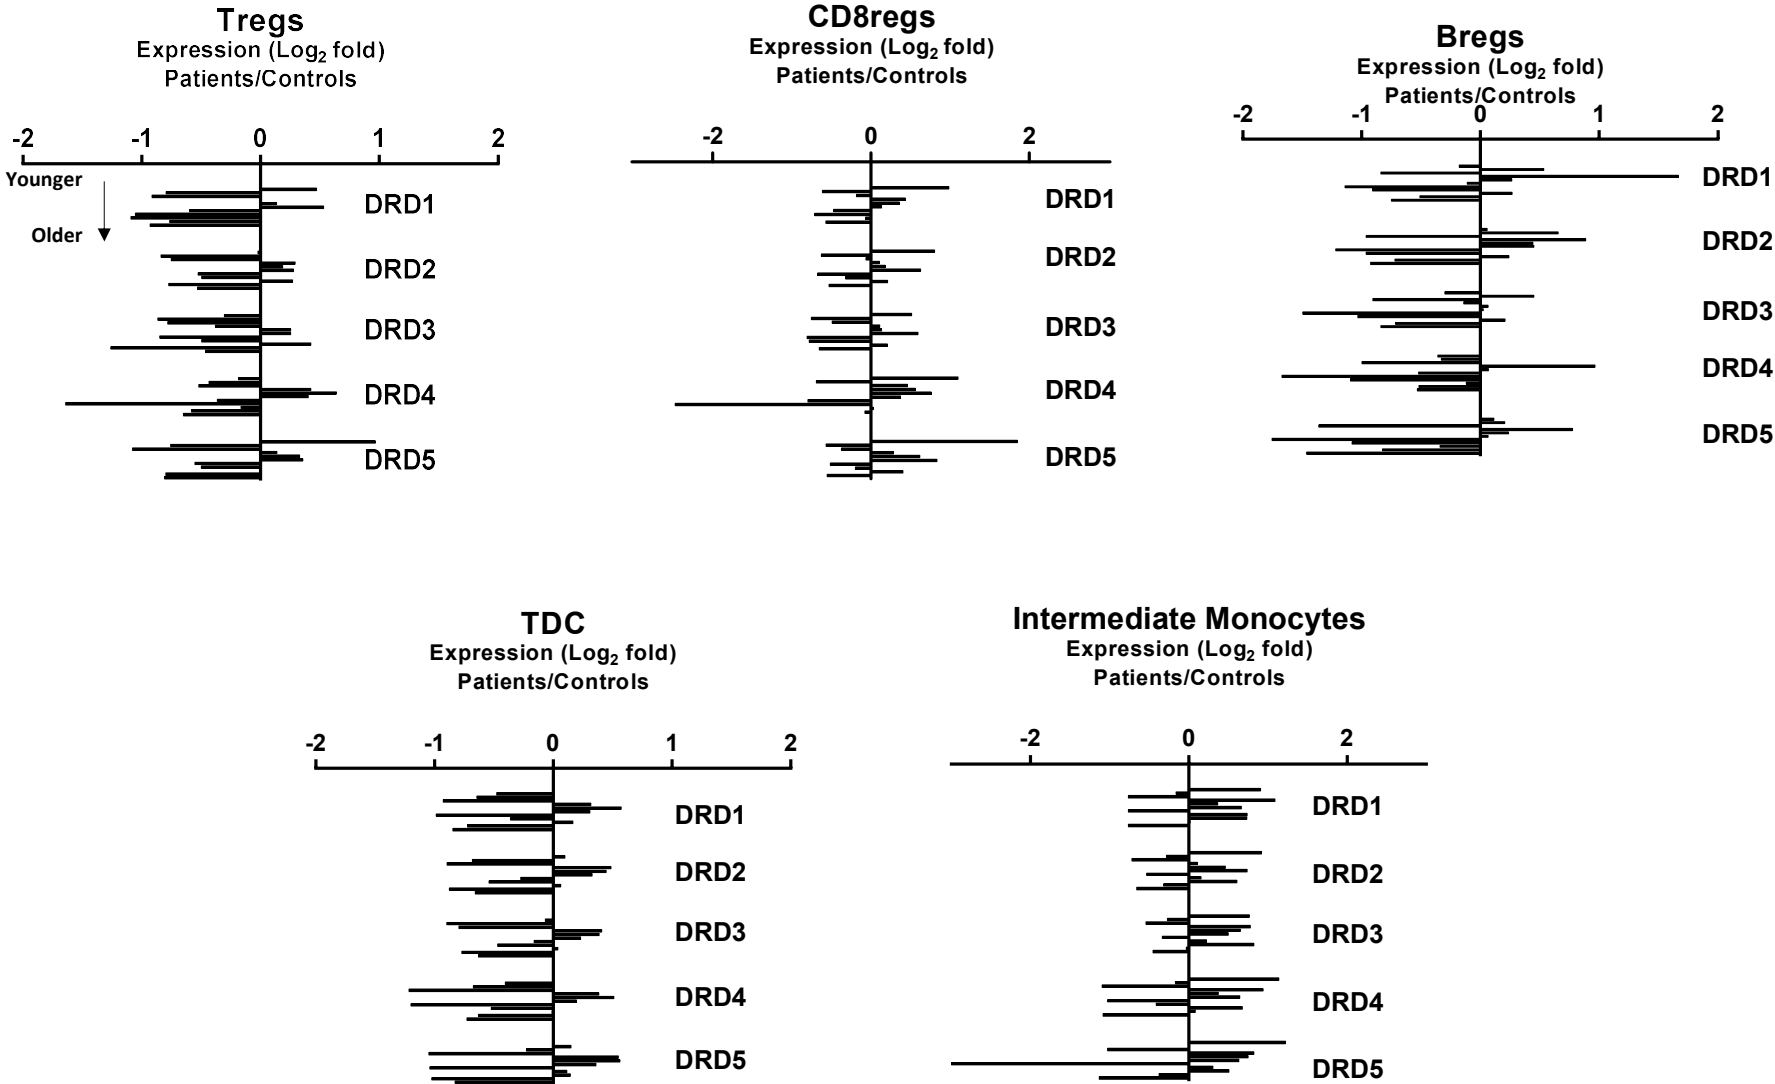

■ H&Y 1-2  
 ■ H&Y 2.5-4

## B) Hoehn and Yahr stage

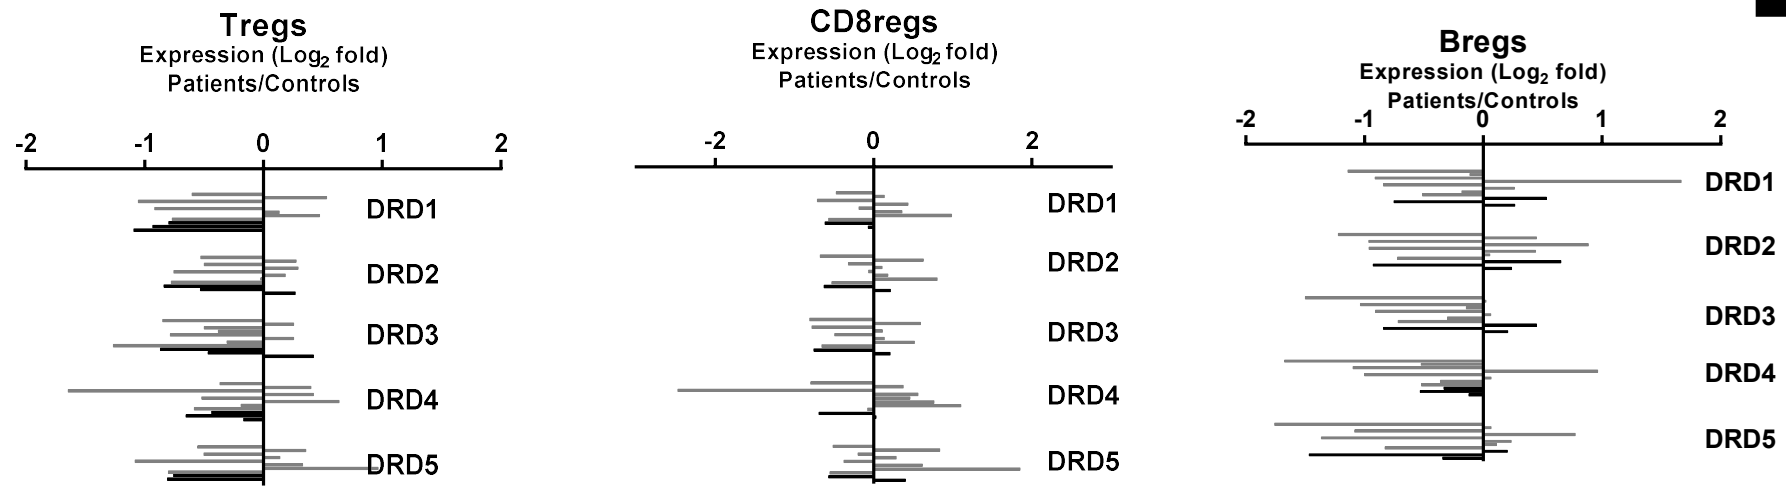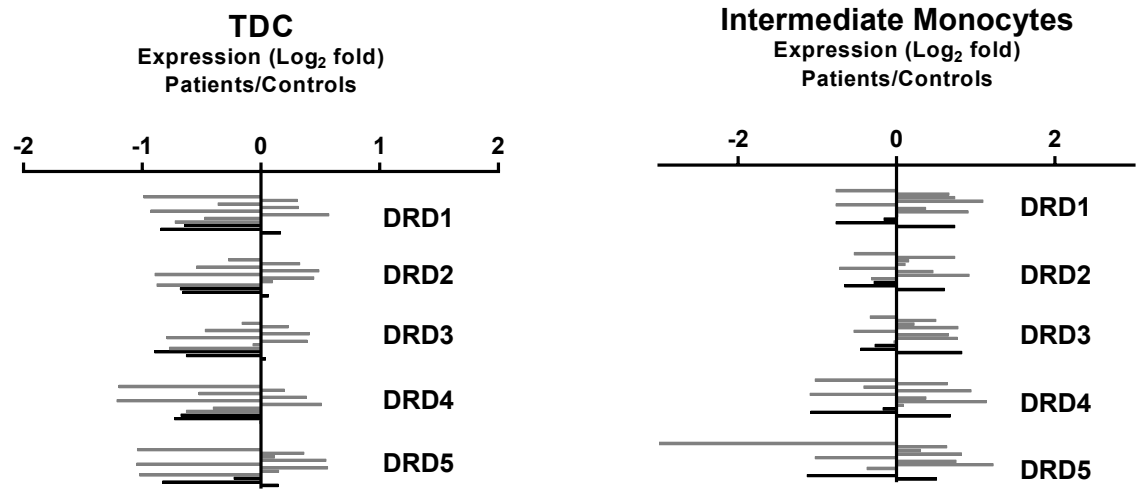

# C) Treatment

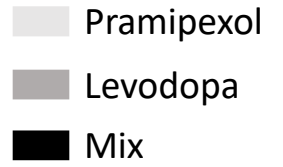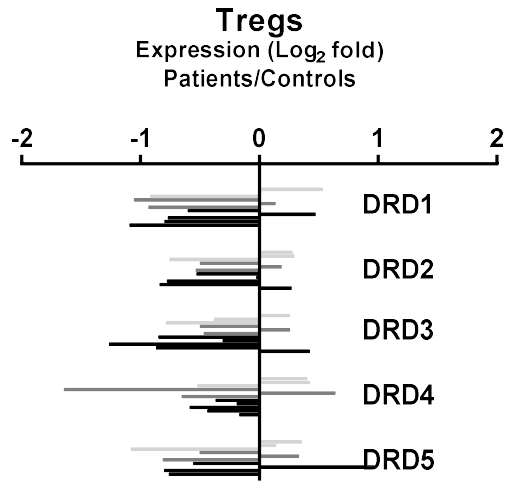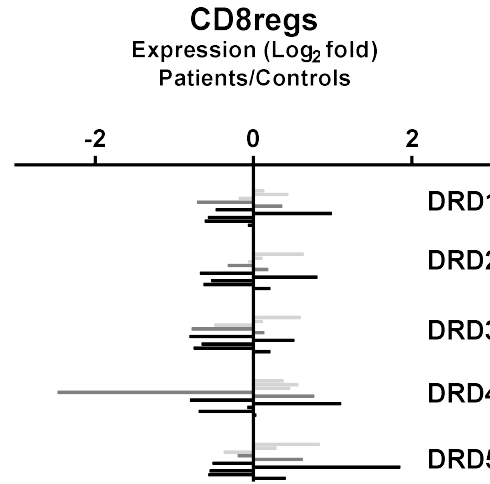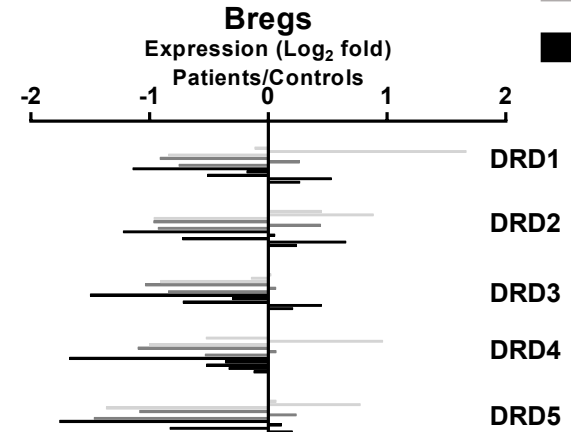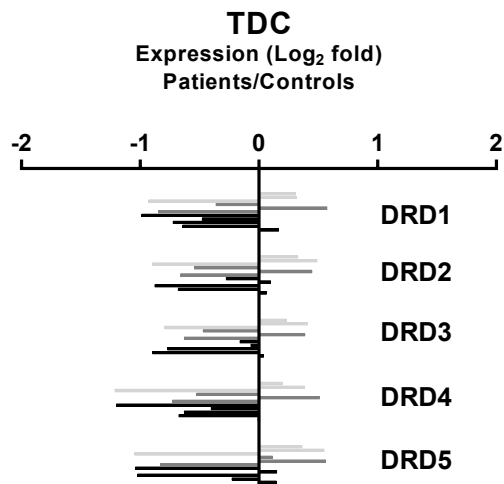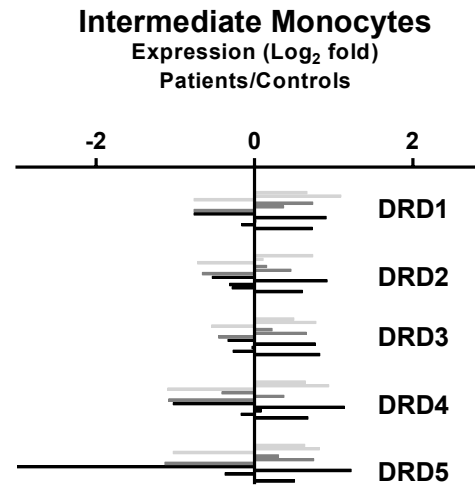

## D) Disease duration

0-3 Years  
4+ years

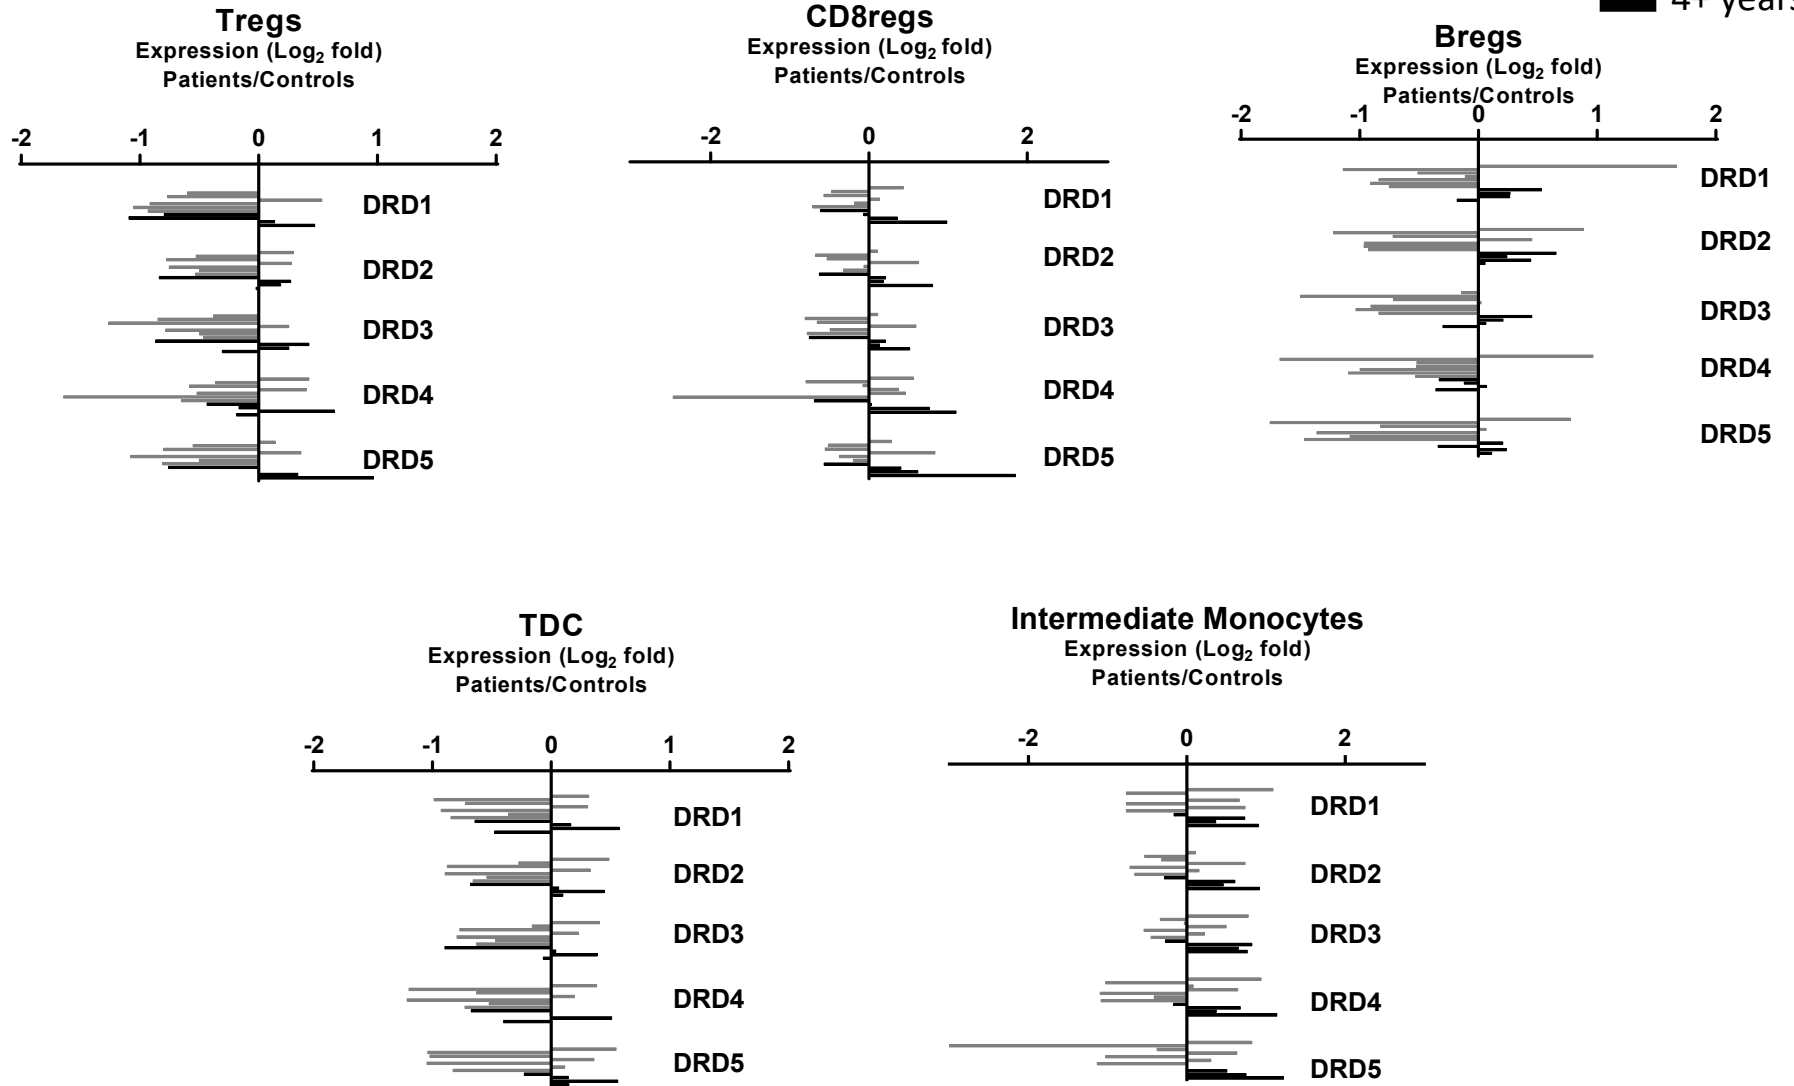

Supplement: Supplementary file 1 [file 1]
