# Supplementary material
Source: publisher figshare collection journal article supplement (https://karger.figshare.com/articles/dataset/_/8875790)
Supplement: Supplementary file 4 [file 1]

Supplementary figure 5

A)

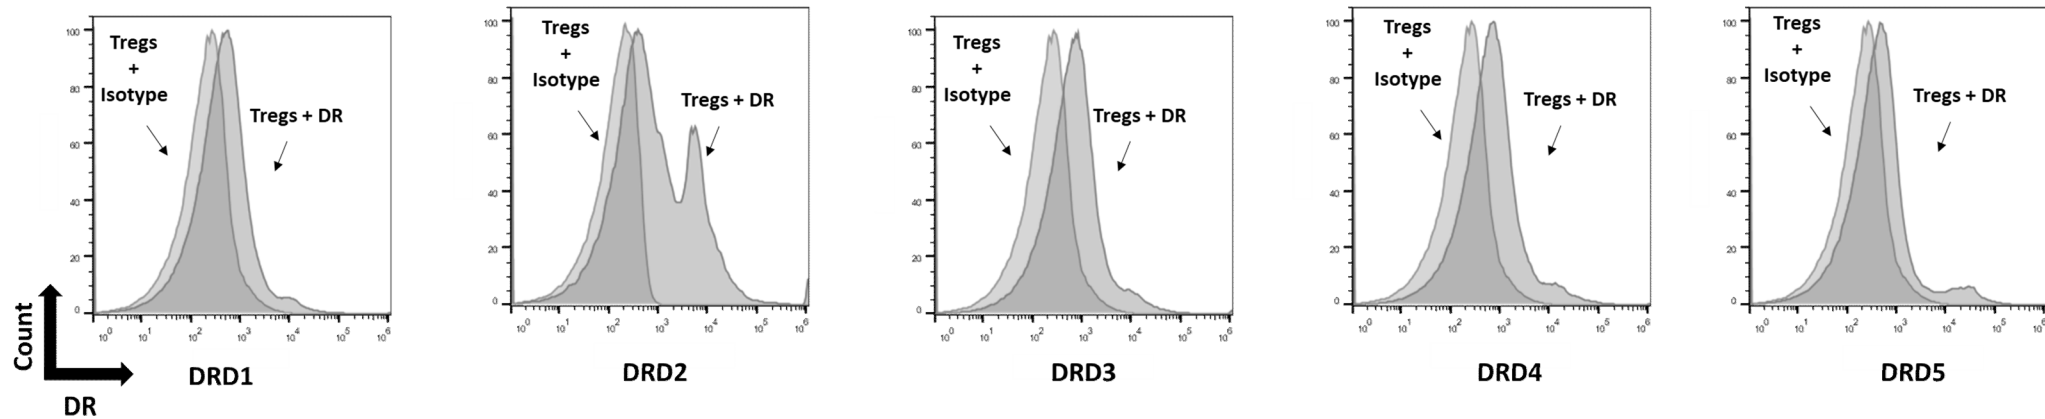

B)

**Expression of dopamine receptors in regulatory immune populations as determined by flow cytometry**

|      | Tregs (%)   |               | CD8regs (%) |             | Bregs (%)     |               | TDC (%)      |              | Int. Monocytes (%) |             |
|------|-------------|---------------|-------------|-------------|---------------|---------------|--------------|--------------|--------------------|-------------|
|      | Patients    | Controls      | Patients    | Controls    | Patients      | Controls      | Patients     | Controls     | Patients           | Controls    |
| DRD1 | 7.27 ± 0.70 | 15.85 ± 17.88 | 0 ± 0       | 0.29 ± 0.17 | 38.11 ± 39.23 | 54.21 ± 54.77 | 1.22 ± 0.087 | 0.73 ± 0.37  | 5.50 ± 2.62        | 1.46 ± 0.96 |
| DRD2 | 6.59 ± 3.48 | 1.53 ± 0.55   | 0 ± 0       | 0 ± 0       | 8.04 ± 5.71   | 9.85 ± 6.42   | 3.13 ± 1.93  | 9.06 ± 12.30 | 9.46 ± 7.46        | 1.21 ± 0.33 |
| DRD3 | 5.72 ± 3.69 | 1.58 ± 0.73   | 0 ± 0       | 0 ± 0       | 15.83 ± 11.04 | 8.08 ± 3.03   | 1.38 ± 0.14  | 0.67 ± 0.00  | 6.05 ± 5.39        | 1.11 ± 0.10 |
| DRD4 | 4.56 ± 1.09 | 1.84 ± 1.24   | 0.02 ± 0.03 | 0 ± 0       | 14.55 ± 6.17  | 13.36 ± 14.38 | 2.50 ± 0.99  | 1.87 ± 2.15  | 12.34 ± 9.52       | 1.37 ± 0.72 |
| DRD5 | 7.48 ± 3.08 | 1.59 ± 0.62   | 0.04 ± 0.06 | 0.13 ± 0.19 | 39.16 ± 50.68 | 59.79 ± 8.31  | 4.59 ± 2.14  | 1.36 ± 1.23  | 16.04 ± 13.70      | 1.84 ± 0.51 |
