# Supplementary material
Source: publisher figshare collection journal article supplement (https://karger.figshare.com/articles/dataset/_/8875790)

Supplementary Figure 3

● Controls  
□ Patients

Tregs

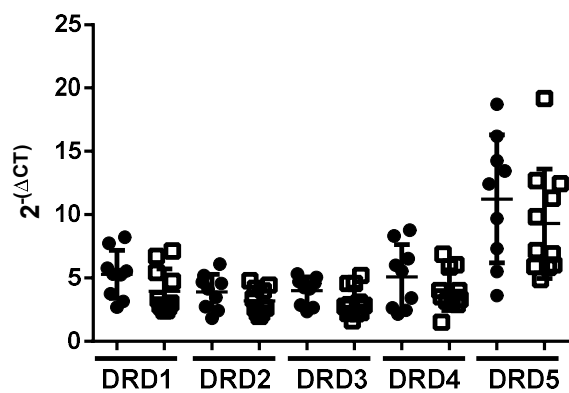

Bregs

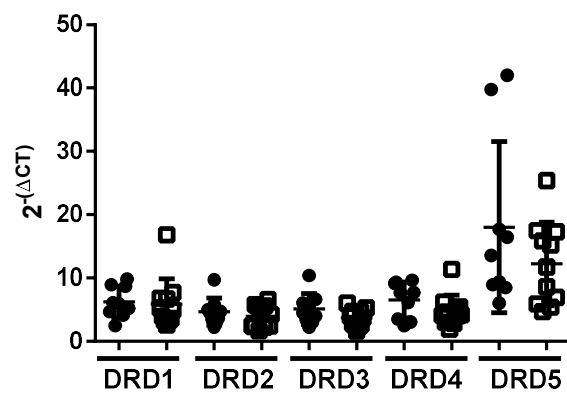

CD8regs

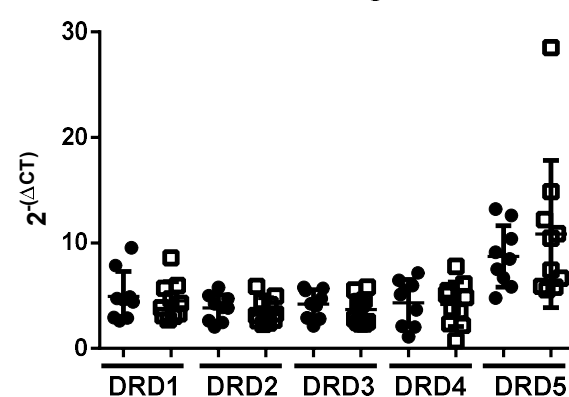

TDC

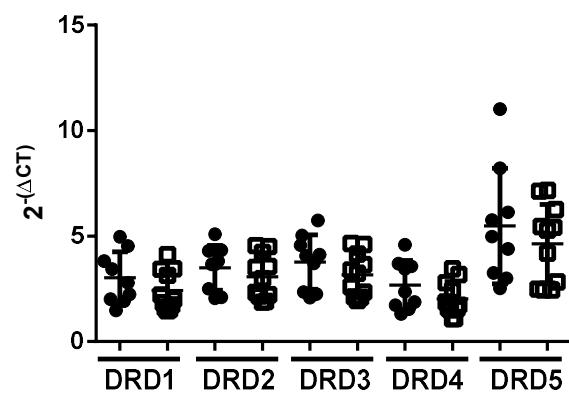

Int. Monocytes

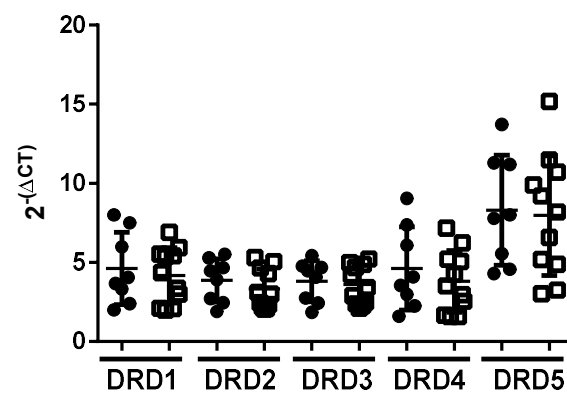

Supplement: Supplementary file 2 [file 1]

# SUPPLEMENTARY FIGURE 1

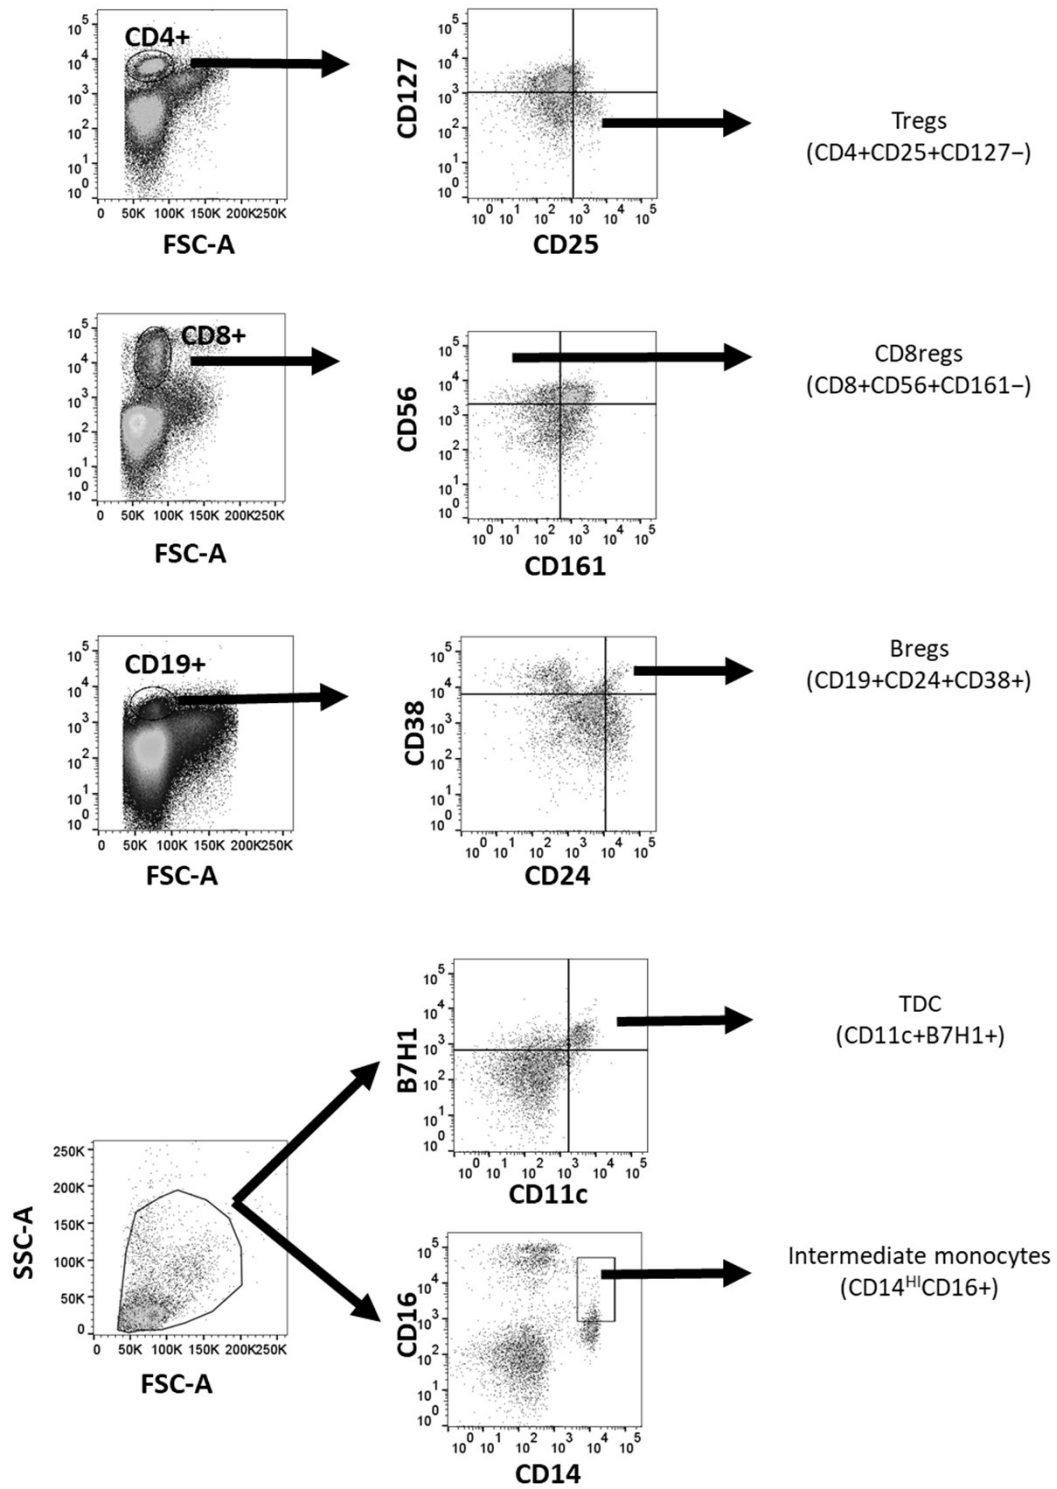

Supplement: Supplementary file 3 [file 1]

# Supplementary Figure 2

A)

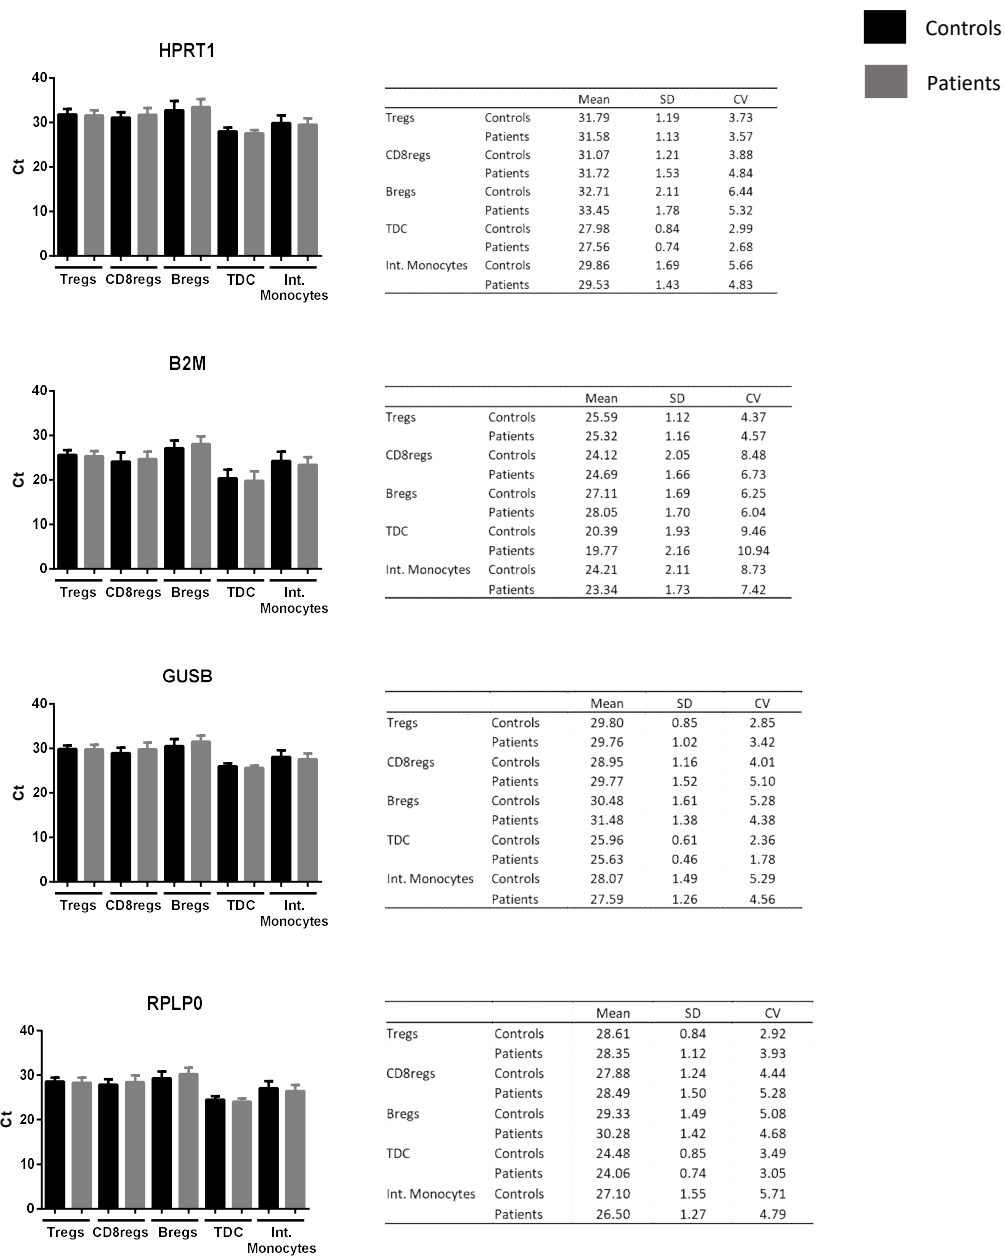

B)

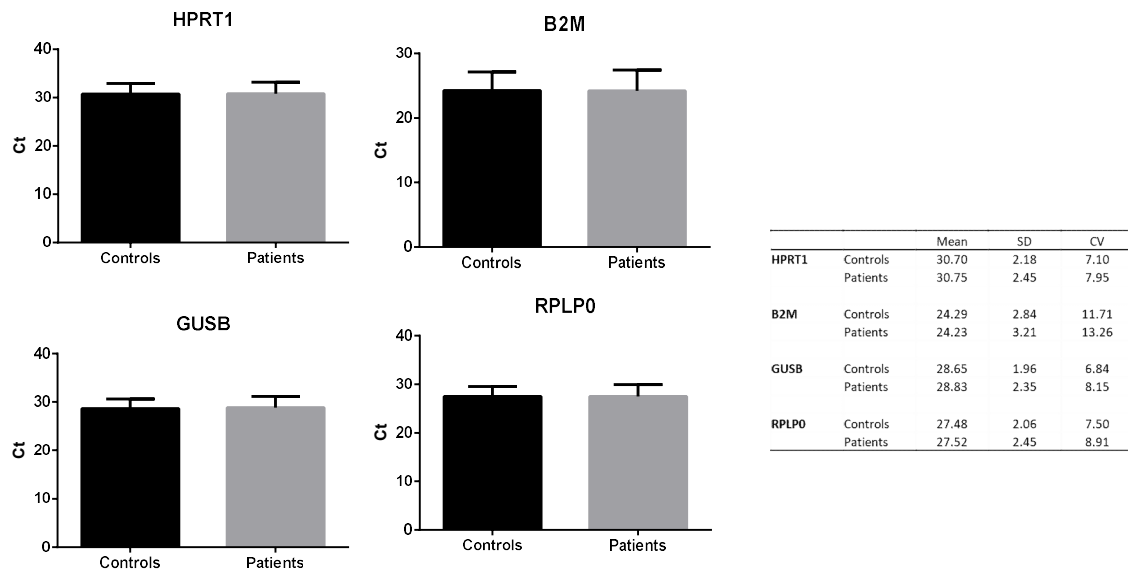

Supplement: Supplementary file 5 [file 1]
